# Supplementary material
Source: PubMed Central journal article supplement (PMC10323894)
Supplement: djad070_supplementary_data.pdf [file djad070_supplementary_data.pdf]

## **Supplementary Material**

### **Kidney Function Trajectories in Patients with Ovarian Cancer Treated with Poly (ADP-ribose) polymerase (PARP) Inhibitors**

Table of Contents

|                                                                                                                                |            |
|--------------------------------------------------------------------------------------------------------------------------------|------------|
| <b>Supplemental Tables</b> .....                                                                                               | <b>3</b>   |
| Supplementary Table 1. Etiology of Sustained AKI in Patients Treated with Olaparib and Niraparib.....                          | 3          |
| <br>                                                                                                                           |            |
| <b>Supplemental Figures</b> .....                                                                                              | <b>4-8</b> |
| Supplementary Figure 1. Etiology of Any AKI in Patients Treated with Olaparib and Niraparib.....                               | 4          |
| Supplementary Figure 2. Incidence and Severity of AKI among Olaparib and Niraparib-Treated Patients. ....                      | 5          |
| Supplementary Figure 3. AKI Severity among Olaparib and Niraparib-Treated Patients with Transient<br>versus Sustained AKI..... | 6          |
| Supplementary Figure 4. Flow Diagram for Carboplatin/Paclitaxel-Treated Matched Controls.....                                  | 7          |
| Supplementary Figure 5. Sustained eGFR Decline During 12 Month Follow-Up in PARPi-Treated Patients and<br>Controls.....        | 8          |

**Supplementary Table 1: Etiology of Sustained AKI in Patients Treated with Olaparib and Niraparib**

| Age* | PARPi     | Etiology of Sustained AKI                                                            | UA Preceding AKI**                                   | UA at the Time of AKI**                              |
|------|-----------|--------------------------------------------------------------------------------------|------------------------------------------------------|------------------------------------------------------|
| 55   | Niraparib | Hemodynamic AKI in the setting of partial small bowel obstruction                    | +LE, 15 WBCs                                         | 1+ blood, 2+ protein, 10 RBCs, 34 WBCs               |
| 55   | Niraparib | PARPi-related                                                                        | NA                                                   | NA                                                   |
| 65   | Olaparib  | Bevacizumab-associated TMA (clinically diagnosed)                                    | 1+ blood, +LE, 2 RBCs, 2 WBCs                        | Bland                                                |
| 55   | Niraparib | PARPi-related                                                                        | NA                                                   | Bland                                                |
| 75   | Olaparib  | Hemodynamic-mediated AKI after paracentesis                                          | Bland                                                | NA                                                   |
| 55   | Niraparib | Obstructive AKI                                                                      | 3+ blood, 1+ LE, 2+ protein, >100 RBCs, 10-20 WBCs   | 1+ blood, 1+ protein, 1 RBCs, 5 WBCs                 |
| 70   | Olaparib  | Hemodynamic-mediated AKI in the setting of intravenous contrast and poor oral intake | +LE, +nitrite                                        | Bland                                                |
| 70   | Olaparib  | Hemodynamic-mediated AKI in the setting of lisinopril use                            | +LE, 3 RBCs                                          | NA                                                   |
| 50   | Olaparib  | Obstructive AKI                                                                      | 3+ blood, trace LE, 137 RBCs, 2 WBCs                 | NA                                                   |
| 55   | Olaparib  | Obstructive AKI                                                                      | Bland                                                | 3+ blood, 21 RBCs                                    |
| 60   | Olaparib  | Hemodynamic-mediated AKI in the setting of <i>Clostridioides difficile</i> diarrhea  | 2+ LE, 1+ protein, 2+ urobilinogen, 4 RBCs, 182 WBCs | 2+LE, 2+ protein, 1+ urobilinogen, 10 RBCs, 151 WBCs |
| 45   | Olaparib  | Obstructive AKI                                                                      | Trace LE                                             | 3+ blood, 1+ LE, 2+ protein, >100 RBCs, 10-20 WBCs   |
| 35   | Olaparib  | Obstructive AKI                                                                      | +LE, 1+ protein, 4 RBCs, 31 WBCs                     | 3+ LE, +nitrite, 1+ protein, 4 RBCs, 122 WBCs        |
| 70   | Olaparib  | Hemodynamic-mediated AKI in the setting of diarrhea                                  | Bland                                                | Bland                                                |
| 75   | Olaparib  | PARPi-related                                                                        | NA                                                   | 2+ blood, +LE, 1 RBC, 5 WBCs, 4 hyaline casts        |
| 75   | Niraparib | Obstructive AKI                                                                      | 2+ LE, 17 WBCs                                       | NA                                                   |
| 70   | Olaparib  | PARPi-related                                                                        | NA                                                   | NA                                                   |
| >80  | Niraparib | PARPi-related                                                                        | 1+ blood, +LE, 4 WBCs                                | 1+ blood, +LE, 3 RBCs, 40 WBCs, 8 hyaline casts      |
| 25   | Olaparib  | PARPi-related                                                                        | 3 WBCs                                               | NA                                                   |
| 65   | Olaparib  | Hemodynamic-mediated AKI in the setting of paracentesis                              | 1+ blood                                             | 3 hyaline casts                                      |
| 60   | Olaparib  | Obstructive AKI                                                                      | 3+ blood, 3+ LE, 2+ protein, >182 RBCs, >182 WBCs    | 1+ blood, +LE, 36 RBCs, >182 WBCs                    |

Legend:

\*Ages were rounded to the nearest 5 years to maintain anonymity.

\*\*Urinalysis findings preceding sustained AKI were defined as any urinalyses checked in the 6 months prior to and closest to the AKI event. Urinalysis findings at the time of AKI were defined as any urinalyses obtained either on the day of AKI or within 30 days following the date of sustained AKI

Abbreviations: AKI = acute kidney injury, LE = leukocyte esterase, PARPi = Poly (ADP-ribose) polymerase inhibitors, RBCs=red blood cells, TMA = thrombotic microangiopathy, UA = urinalysis, WBCs = white blood cells

**Supplementary Figure 1. Etiology of Any AKI in Patients Treated with Olaparib and Niraparib**

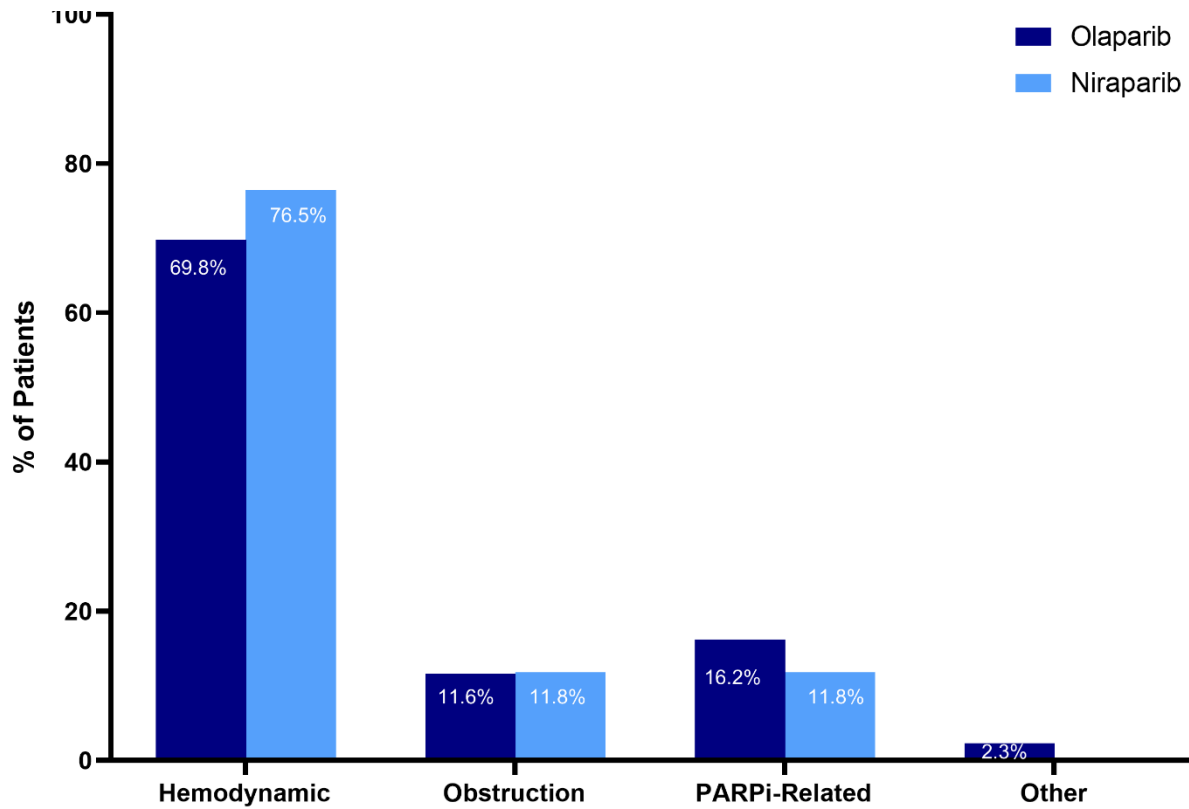

**Legend:**

Of the 43 olaparib-treated patients with AKI, 30 (69.8%) had hemodynamic-mediated AKI, 5 (11.6%) had obstruction, 7 (16.2%) had AKI attributable to the PARPi, and 1 had another etiology (2.3%; clinically-diagnosed bevacizumab-associated thrombotic microangiopathy).

Of the 17 niraparib-treated patients with AKI, 13 (76.5%) had hemodynamic-mediated AKI, 2 (11.8%) had obstruction, 2 (11.8%) had PARPi-related AKI, and none had another underlying etiology.

Supplementary Figure 2. Incidence and Severity of AKI among Olaparib and Niraparib-Treated Patients

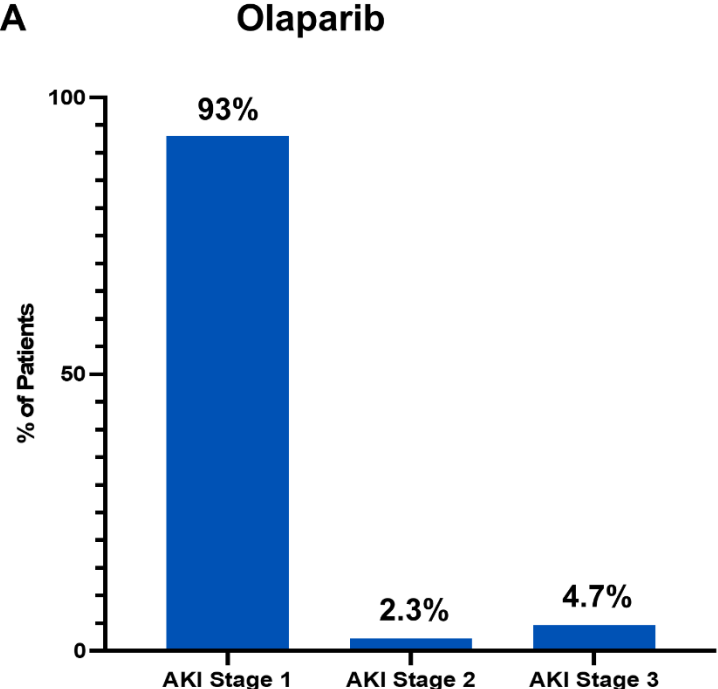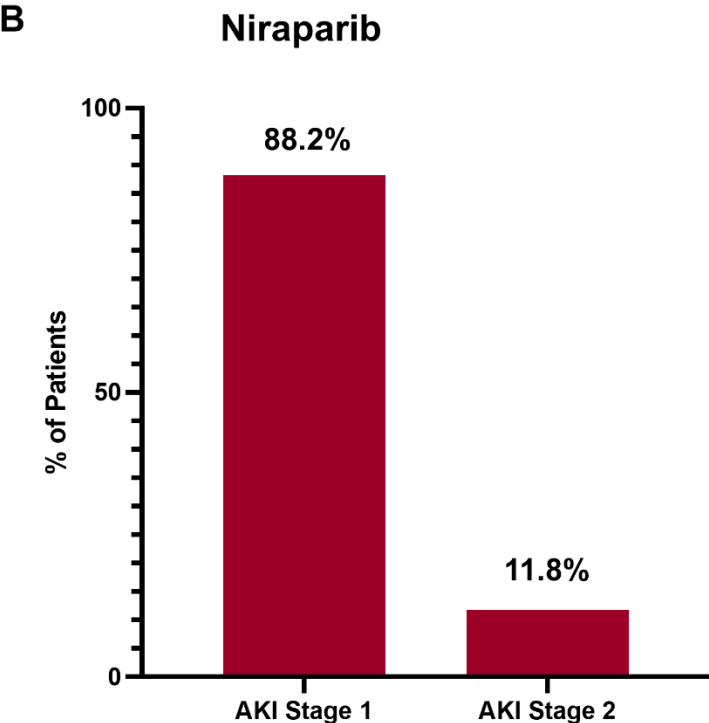

**Supplementary Figure 3. AKI Severity among Olaparib and Niraparib-Treated Patients with Transient versus Sustained AKI**

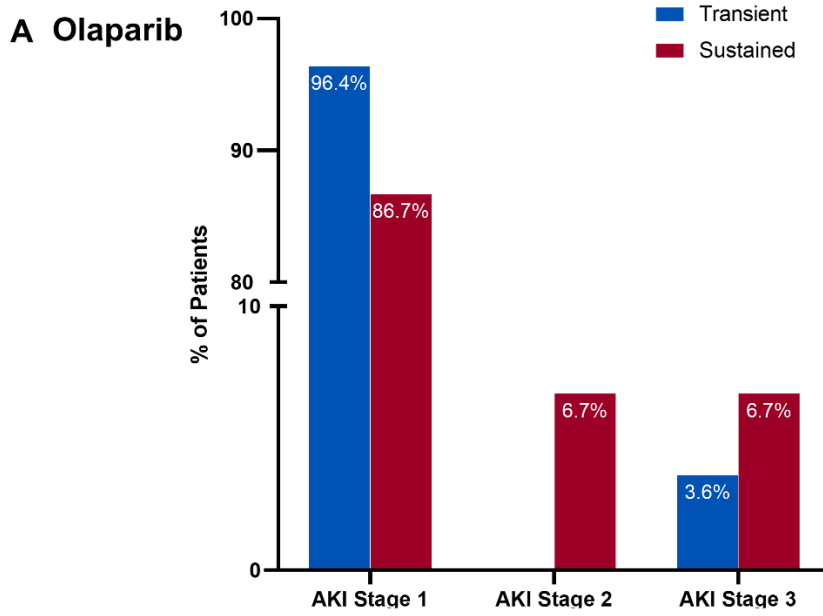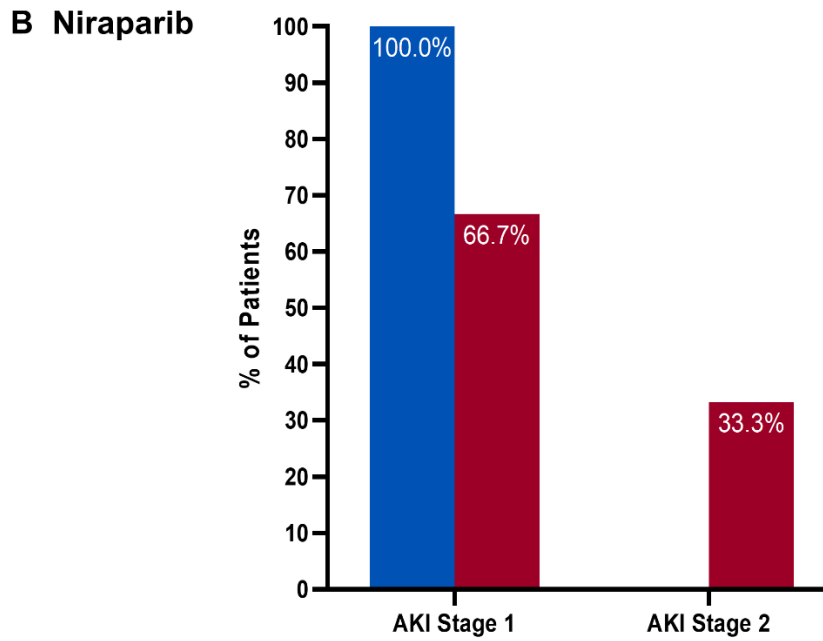

**Supplementary Figure 4. Flow Diagram for Carboplatin/Paclitaxel-Treated Matched Controls**

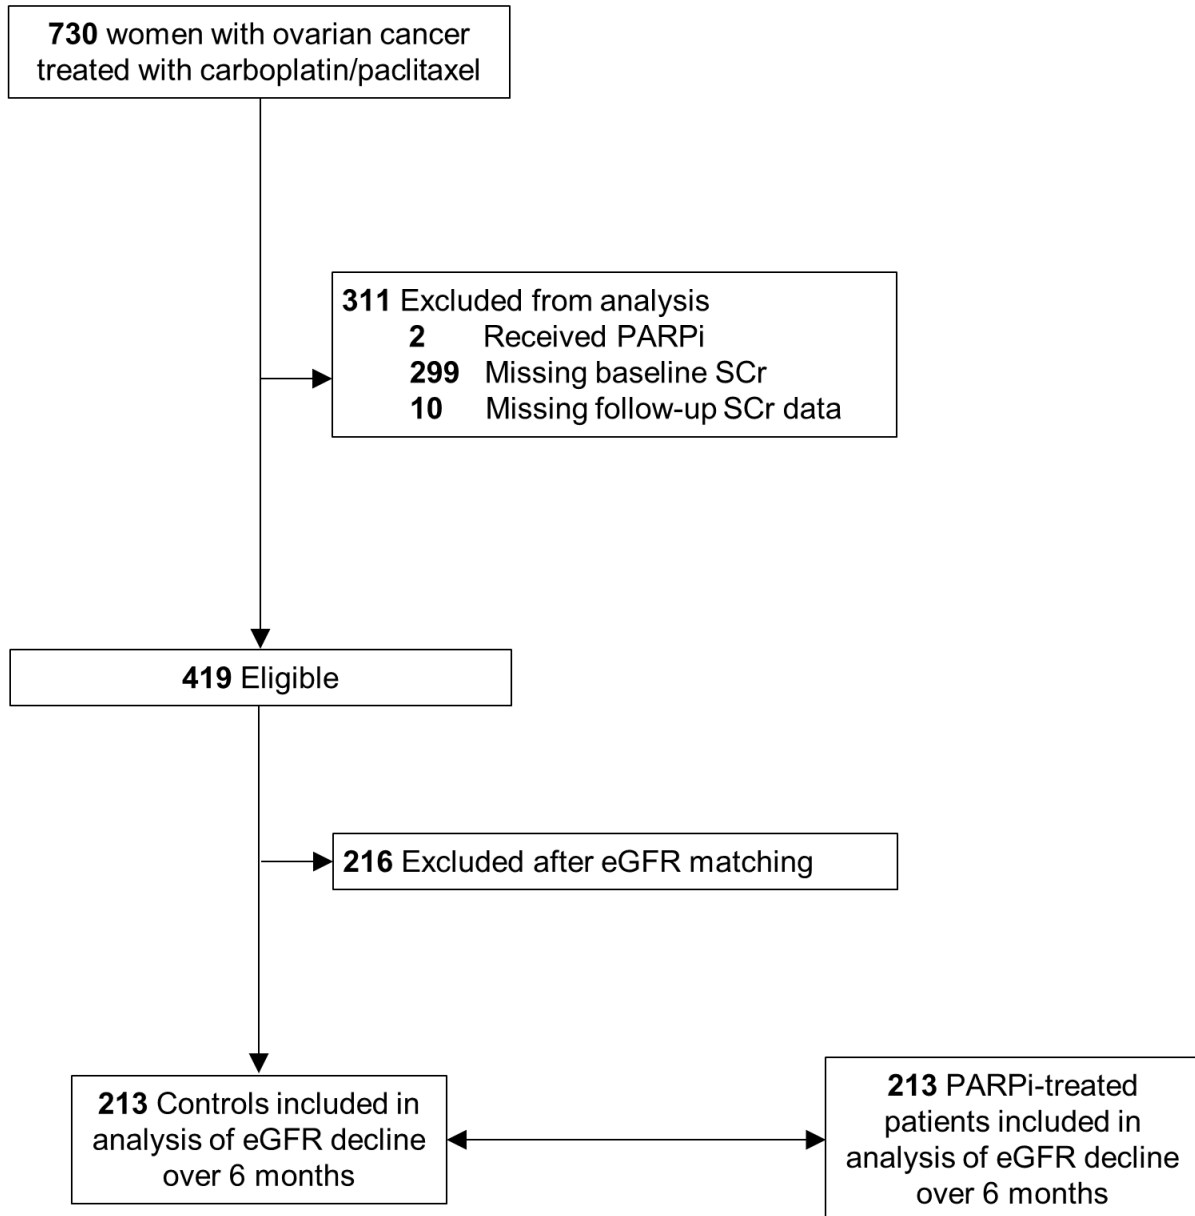

**Legend:**

Abbreviations: eGFR, estimated glomerular filtration rates; PARPi, Poly (ADP-ribose) polymerase inhibitors; SCr, serum creatinine

Controls were matched with PARPi-treated patients 1:1 by eGFR within 5 ml/min per 1.73 m<sup>2</sup>

**Supplementary Figure 5. Sustained eGFR Decline During 12 Month Follow-Up in PARPi-Treated Patients and Controls**

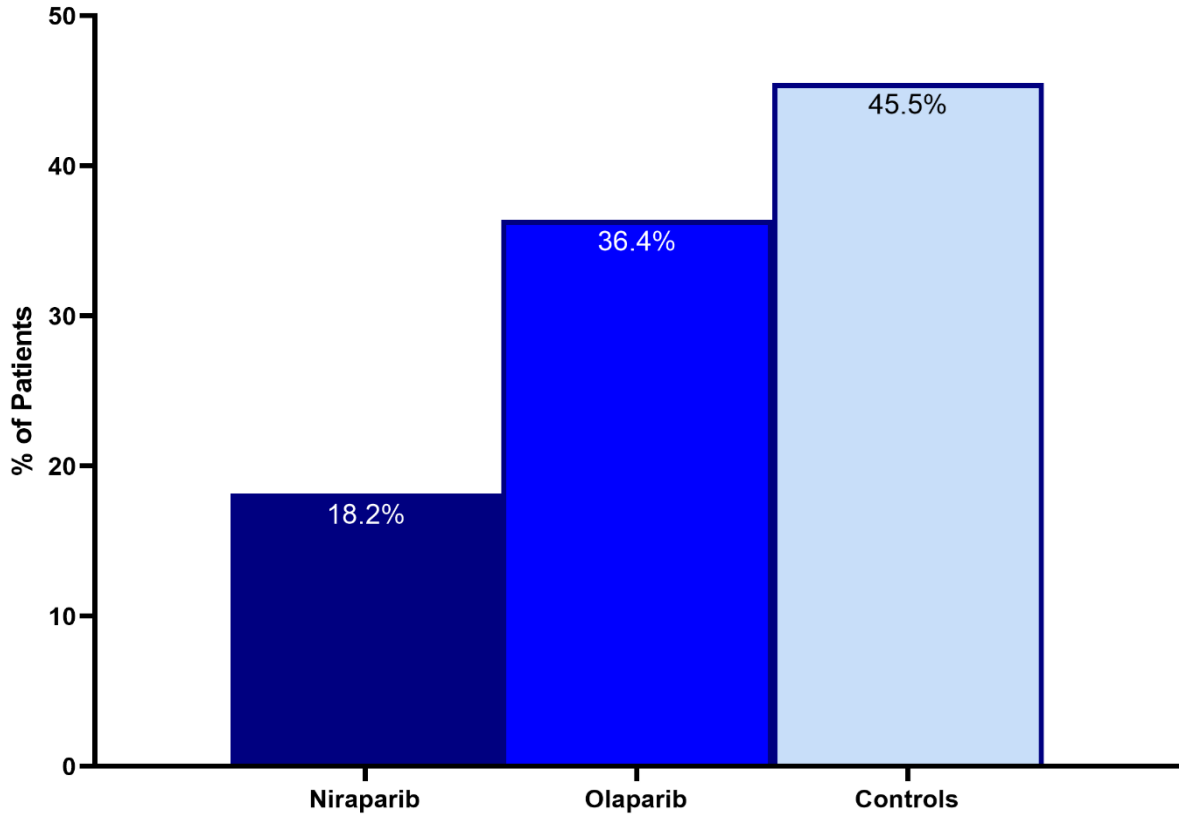

**Legend:**

Abbreviations: eGFR, estimated glomerular filtration rate

Bar graph shows the proportion of patients treated with niraparib, olaparib, and carboplatin/paclitaxel who had a sustained decline in eGFR in the 12 months following treatment initiation, defined as a sustained decline in eGFR of  $\geq 30\%$  for 90 consecutive days or more. Total n=11, of whom 2 were on niraparib (18.2%), 4 were on olaparib (36.4%), and 5 were on carboplatin/paclitaxel (45.5%)
